# Supplementary material for: Differentiation of the Infarct Core from Ischemic Penumbra within the First 4.5 Hours, Using Diffusion Tensor Imaging-Derived Metrics: A Rat Model
Source: PubMed Central journal article supplement — Korean J Radiol. 2017 Feb 7;18(2):269–78. doi: 10.3348/kjr.2017.18.2.269 (PMC5313515; doi:10.3348/kjr.2017.18.2.269), 2017-02-07
Supplement: kjr-18-269-s001.pdf [file kjr-18-269-s001.pdf]

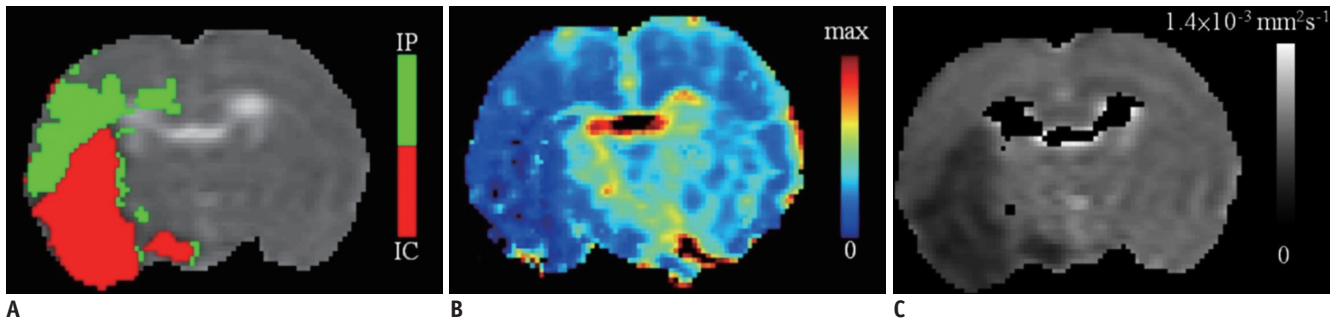

**Supplementary Fig. 1. Representative perfusion/diffusion mismatch (A) by coregistration of rCBF map (B) and ADC map (C).** Perfusion deficit was determined using reduction of 46% of rCBF compared to contralateral hemisphere. Abnormal ADC was defined using reduction of 30% of contralateral hemisphere with exclusion of ventricles. ADC = apparent diffusion coefficient, rCBF = relative cerebral blood flow
