# Supplementary material for: Differentiation of the Infarct Core from Ischemic Penumbra within the First 4.5 Hours, Using Diffusion Tensor Imaging-Derived Metrics: A Rat Model
Source: PubMed Central journal article supplement — Korean J Radiol. 2017 Feb 7;18(2):269–78. doi: 10.3348/kjr.2017.18.2.269 (PMC5313515; doi:10.3348/kjr.2017.18.2.269), 2017-02-07
Supplement: kjr-18-269-s002.pdf [file kjr-18-269-s002.pdf]

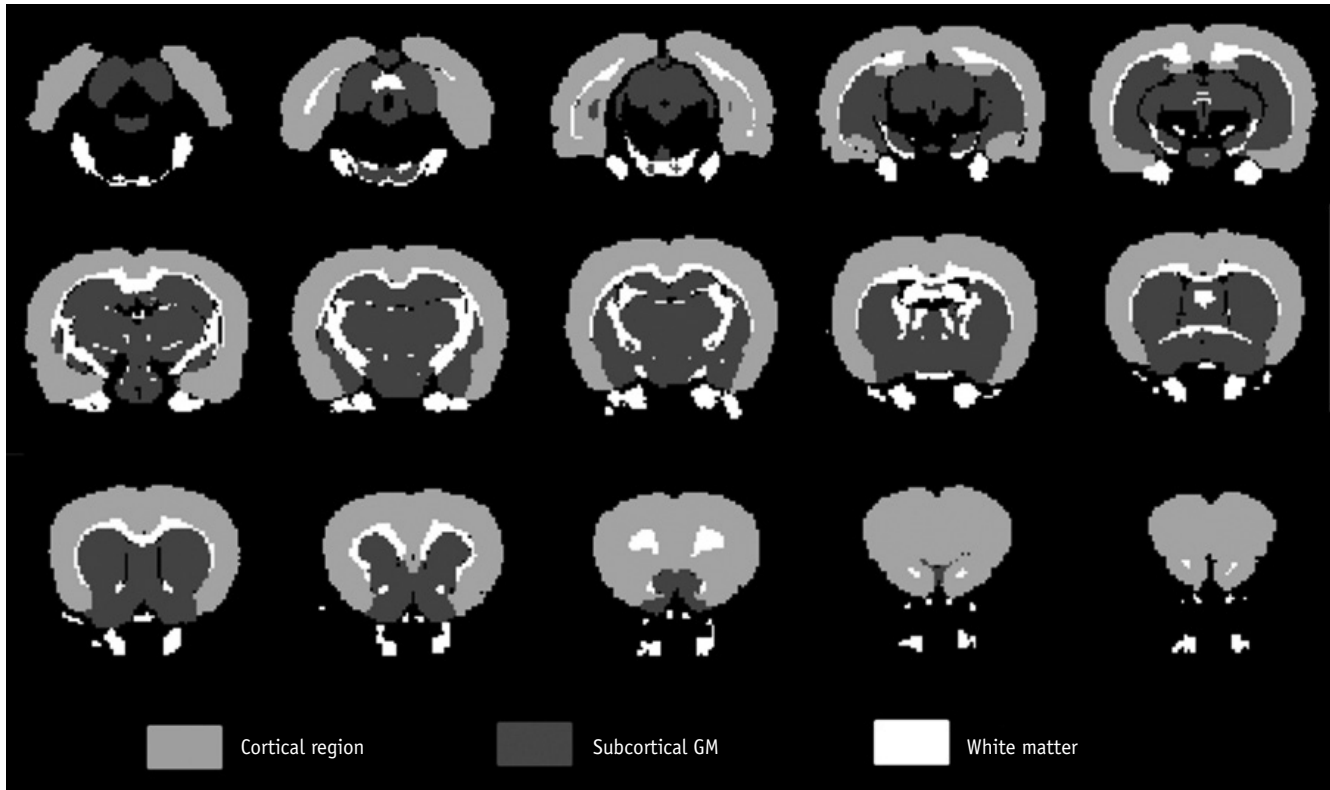

Supplementary Fig. 2. Spatial maps of identified cortical (light grey), subcortical GM (dark gray), and white matter (white). If change in title is acceptable to author, please use revised title in all future correspondences. GM = gray matter
